# Supplementary material for: Development and Validation of the Acculturation Discrepancy Scale for Youth of Korean Descent in Japan（ADS-KJ）
Source: Research Square preprint supplement (doi:10.21203/rs.3.rs-7499682/v2), 2025-11-24
Supplement: Supplementary file 3 [file 6dd336a49f9abb2a2d9a1f02.xlsx]

## Sheet: Table 1
Table 1
Descriptive Sample Characteristics
Variable	Korean Descent sample (N ＝ 278)	Japanese sample (N = 110)
Age	21.63 (SD = 3.15) [18-30]	22.08 (SD = 3.45) [18-29]
Gender
Women	133 (47.8%)	47 (42.7%)
Men	142 (51.1%)	62 (56.4%)
Prefer not to answer	3 (1.1%)	1 (0.9%)
Highest educational degree
Junior high school degree	3 (1.1%)	0 (0%)
High school degree	204 (73.4%)	70 (63.6%)
Associate degree	11 (4.0%)	0 (0%)
Bachelor’s degree	49 (17.6%)	39 (35.5%)
Advanced degree	11 (4.0%)	1 (0.9%)
Generation status
First generation	6 (2.2%)	–
1.5 generation	6 (2.2%)	–
Second generation	19 (6.8%)	–
Third generation	61 (21.9%)	–
Fourth generation	169 (60.8%)	–
Fifth generation	1 (0.4%)	–
Ethnic organization affiliation
Affiliated	249 (89.6%)	–
Not affiliated	29 (10.4%)	–
ADS-KJ
Identity Gap	M = 1.82 (SD = 0.16) [1-5]	M = 1.30 (SD = 0.53) [1-5]
Value Gap	M = 2.22 (SD = 0.16) [1-5]	M = 1.77 (SD = 0.76) [1-5]
PHQ-9	M = 1.81 (SD = 0.96) [1-4]	M = 1.83 (SD = 0.63) [1-4]
GAD-7	M = 1.78 (SD = 0.95) [1-4]	M = 1.81 (SD = 0.71) [1-4]
UCLA Loneliness	M = 1.95 (SD = 0.93) [1-4]	M = 2.08 (SD = 0.56) [1-4]
VIA
Heritage	M = 6.31 (SD = 1.63) [1-9]	–
Mainstream	M = 5.83 (SD = 1.28) [1-9]	–
Note. ADS-KJ: Acculturation Discrepancy Scale for Youth of Korean Descent in Japan, PHQ-9: The Japanese version of Patient Health Questionnaire-9, GAD-7: The Japanese version of Generalized Anxiety Disorder-7, UCLA Loneliness: The Japanese version of UCLA Loneliness Scale (Version 3), VIA: Vancouver Index of Acculturation
