# Supplementary material for: Development and Validation of the Acculturation Discrepancy Scale for Youth of Korean Descent in Japan（ADS-KJ）
Source: Research Square preprint supplement (doi:10.21203/rs.3.rs-7499682/v2), 2025-11-24
Supplement: Supplementary file 4 [file 73c120c78bae07a8198d01c1.xlsx]

## Sheet: Table 4
Table 4
Intercorrelations Among ADS-KJ Factors and Related Variables in the Japanese Sample
	1		2		3		4		5
1. Identity Gap	－
2. Value Gap	0.43	**	－
3. UCLA Loneliness	0.13		0.14		－
4. GAD-7	0.167017		0.13		0.47	**	－
5. PHQ-9	0.12		0.08		0.47	**	0.77	**	－
*p < .05. **p < .01.
Note. Identity Gap: ADS-KJ Factor 1, Value Gap: ADS-KJ Factor 2, UCLA Loneliness: The Japanese version of UCLA Loneliness Scale (Version 3), GAD-7: The Japanese version of Generalized Anxiety Disorder-7, PHQ-9: The Japanese version of Patient Health Questionnaire-9
