# Supplementary material for: Development and Validation of the Acculturation Discrepancy Scale for Youth of Korean Descent in Japan（ADS-KJ）
Source: Research Square preprint supplement (doi:10.21203/rs.3.rs-7499682/v2), 2025-11-24
Supplement: Supplementary file 5 [file f09962c5e7374a92b0c1a63c.xlsx]

## Sheet: Table 2
Table 2
Pattern Matrix and Descriptive Statistics for ADS-KJ Among Youth of Korean Descent in Japan
Item	Factor1	Factor2	h2
Factor 1: Identity Discrepancy (McDonald's ω = .91)
I perceive differences with my parents regarding which national identity they relate to.	0.829153	-0.0571515	0.642684
I perceive differences with my parents regarding which country's history they are interested in.	0.794953	-0.0976541	0.562726
I perceive differences with my parents regarding which traditional culture they prefer.	0.773423	-0.0781208	0.542986
I perceive differences with my parents regarding which country's politics they are interested in.	0.725649	-0.00826991	0.520547
I perceive differences with my parents regarding how much pride they feel in their nationality.	0.697861	0.0561951	0.529955
I perceive differences with my parents regarding the ethnic background of their close friends.	0.687848	0.0377519	0.500905
I perceive differences with my parents regarding which country's food they prefer.	0.666855	0.107979	0.529408
I perceive differences with my parents regarding which country they support in sports.	0.638233	0.0949281	0.477821
I perceive differences with my parents regarding which language they use in daily life.	0.605859	-0.0463646	0.340716
I perceive differences with my parents regarding the ethnic background of the person they would prefer me to marry.	0.599555	0.0856843	0.418928
I perceive differences with my parents regarding whether I should use an ethnic name or a commonly used name.	0.576382	0.050177	0.364076
Factor 2: Value Discrepancy (McDonald's ω = .90)
I perceive differences with my parents regarding the belief that "men must be active in society."	-0.0453655	0.835803	0.7422
I perceive differences with my parents regarding the belief that "fathers should be the most respected in the family."	-0.00729635	0.81382	0.7063
I perceive differences with my parents regarding the belief that "housework is for women."	-0.0102715	0.780795	0.589181
I perceive differences with my parents regarding the belief that "children should attend high-ranking schools."	0.000605719	0.723978	0.486811
I perceive differences with my parents regarding the belief that "parents should intervene in children's employment and education."	0.0835359	0.673796	0.519515
I perceive differences with my parents regarding the belief that "children should work for prestigious companies."	-0.0201966	0.673756	0.435251
I perceive differences with my parents regarding the belief that "children should be filial to their parents."	-0.0149235	0.599647	0.320764
I perceive differences with my parents regarding the belief that "children should live with their parents even after marriage."	0.0295696	0.59679	0.343195
I perceive differences with my parents regarding the belief that "parents should intervene in their children's romance or marriage."	0.059837	0.587771	0.35856
I perceive differences with my parents regarding the belief that "a mismatch between assigned and identified gender should not exist."	0.0513484	0.58029	0.334227
Note. h2= communalities.
